# Supplementary material for: Lymphopenia as a Biological Predictor of Outcomes in COVID-19 Patients: A Nationwide Cohort Study
Source: MDPI journal article supplement (doi:10.3390/cancers13030471), 2021-01-26
Supplement: s1 [file s1]

## Article

# Lymphopenia as a Biological Predictor of Outcomes in COVID-19 Patients: A Nationwide Cohort Study

Jongmin Lee <sup>1,2,†</sup>, Sung-Soo Park <sup>2,3,†</sup>, Tong Yoon Kim <sup>2,3,†</sup>, Dong-Gun Lee <sup>2,4,\*</sup> and Dong-Wook Kim <sup>2,3,\*</sup>

<sup>1</sup> Division of Pulmonary, Allergy and Critical Care Medicine, Department of Internal Medicine, The Catholic University of Korea, Seoul 06591, Korea; dibs01@catholic.ac.kr

<sup>2</sup> Catholic Hematology Hospital, College of Medicine, The Catholic University of Korea, Seoul 06591, Korea; sspark@catholic.ac.kr (S.-S.P.); TYK@catholic.ac.kr (T.Y.K.)

<sup>3</sup> Division of Hematology, Department of Internal Medicine, College of Medicine, The Catholic University of Korea, Seoul 06591, Korea

<sup>4</sup> Division of Infectious Diseases, Department of Internal Medicine, College of Medicine, The Catholic University of Korea, Seoul 06591, Korea

\* Correspondence: symonlee@catholic.ac.kr (D.-G.L.); dwkim@catholic.ac.kr (D.-W.K.); Tel.: +82-2-2258-6003 (D.-G.L.); +82-2-2258-7030 (D.-W.K.); Fax: +82-2-535-2494 (D.-G.L.); +82-2-593-2522 (D.-W.K.)

† The first author: J.L., S.-S.P. and T.Y.K. contributed equally to this work as first authors.

## Supplementary

**Citation:** Lee, J.; Park, S.-S.; Kim, T.Y.; Lee, D.-G.; Kim, D.-W. Lymphopenia as a Biological Predictor of Outcomes in COVID-19 Patients: A Nationwide Cohort Study. *Cancers* **2021**, *13*, 471. <https://doi.org/10.3390/cancers13030471>

Academic Editors: Gabriella D'Orazi and Mara Cirone

Received: 28 November 2020

Accepted: 20 January 2021

Published: 26 January 2021

**Publisher's Note:** MDPI stays neutral with regard to jurisdictional claims in published maps and institutional affiliations.

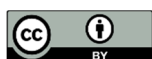

**Copyright:** © 2021 by the authors. Licensee MDPI, Basel, Switzerland. This article is an open access article distributed under the terms and conditions of the Creative Commons Attribution (CC BY) license (<http://creativecommons.org/licenses/by/4.0/>).

**Table S1.** Univariable analysis of factors associated with mortality.

| Variable                                                     | Survival outcome (total N = 770) |                 | p-value |
|--------------------------------------------------------------|----------------------------------|-----------------|---------|
|                                                              | Death (n = 162)                  | Alive (n = 608) |         |
| <b>Age</b>                                                   |                                  |                 | <0.001  |
| < 40 years, no (%)                                           | 1 (1.7%)                         | 59 (98.3%)      |         |
| 40 - 59 years, no (%)                                        | 13 (6.7%)                        | 182 (93.3%)     |         |
| ≥ 60 years, no (%)                                           | 148 (28.7%)                      | 367 (71.3%)     |         |
| <b>Gender, no (%)</b>                                        |                                  |                 | 0.999   |
| Female, no (%)                                               | 67 (21.1%)                       | 250 (78.9%)     |         |
| Male, no (%)                                                 | 95 (21.0%)                       | 358 (79.0%)     |         |
| <b>Systolic blood pressure, baseline, missing n=2 / n=3</b>  |                                  |                 | 0.016   |
| < 140 mmHg, no (%)                                           | 84 (17.8%)                       | 388 (82.2%)     |         |
| ≥ 140 mmHg, no (%)                                           | 76 (25.9%)                       | 217 (74.1%)     |         |
| <b>Diastolic blood pressure, baseline, missing n=2 / n=3</b> |                                  |                 | 0.331   |
| < 80 mmHg, no (%)                                            | 80 (19.5%)                       | 331 (80.5%)     |         |
| ≥ 80 mmHg, no (%)                                            | 80 (22.6%)                       | 274 (77.4%)     |         |
| <b>Heart rate, baseline</b>                                  |                                  |                 | 0.002   |
| < 110 / min, no (%)                                          | 131 (19.3%)                      | 547 (80.7%)     |         |
| ≥ 110 / min, no (%)                                          | 31 (33.7%)                       | 61 (66.3%)      |         |
| <b>Body temperature, baseline</b>                            |                                  |                 | 0.943   |
| < 38.0 °C, no (%)                                            | 133 (19.3%)                      | 503 (80.7%)     |         |
| ≥ 38.0 °C, no (%)                                            | 29 (33.7%)                       | 105 (66.3%)     |         |
| <b>Baseline presentation</b>                                 |                                  |                 |         |
| Sputum (+), no (%)                                           | 54 (21.4%)                       | 198 (78.6%)     | 0.928   |
| Fatigue (+), no (%)                                          | 13 (31.7%)                       | 28 (68.3%)      | 0.127   |
| Dyspnea (+), no (%)                                          | 86 (37.4%)                       | 144 (62.6%)     | <0.001  |
| Mental disturbance (+), no (%)                               | 16 (80%)                         | 4 (20%)         | <0.001  |
| Nausea/vomiting (+), no (%)                                  | 11 (18.6%)                       | 48 (81.4%)      | 0.762   |
| Diarrhea (+), no (%)                                         | 15 (13.2%)                       | 99 (86.8%)      | 0.035   |
| <b>Comorbidity</b>                                           |                                  |                 |         |
| Treating cancer (+), no (%)                                  | 19 (34.5%)                       | 36 (65.5%)      | 0.017   |
| Diabetes (+), no (%)                                         | 68 (32.5%)                       | 141 (67.5%)     | <0.001  |
| Hypertension (+), no (%)                                     | 102 (30.3%)                      | 235 (69.7%)     | <0.001  |
| Chronic cardiac disease (+), no (%)                          | 26 (33.3%)                       | 52 (66.7%)      | 0.008   |
| Chronic pulmonary disease (+), no (%)                        | 11 (37.9%)                       | 18 (62.1%)      | 0.041   |
| Chronic renal disease (+), no (%)                            | 14 (48.3%)                       | 15 (51.7%)      | 0.001   |
| Chronic hepatic disease (+), no (%)                          | 5 (14.7%)                        | 29 (85.3%)      | 0.477   |
| Autoimmune disease (+), no (%)                               | 3 (23.1%)                        | 10 (76.9%)      | 0.999   |
| Dementia (+), no (%)                                         | 64 (48.1%)                       | 69 (51.9%)      | <0.001  |
| <b>Baseline hemogram</b>                                     |                                  |                 |         |
| Hemoglobin                                                   |                                  |                 | <0.001  |
| ≥ 12.5 g/dL, no (%)                                          | 54 (13.1%)                       | 358 (86.9%)     |         |
| < 12.5 g/dL, no (%)                                          | 108 (30.2%)                      | 250 (69.8%)     |         |
| Absolute lymphocyte counts                                   |                                  |                 | <0.001  |
| Group III, ≥ 1,000 /mm <sup>3</sup> , no (%)                 | 43 (13.0%)                       | 287 (87.0%)     |         |
| Group II, ≥ 500 - < 1,000 /mm <sup>3</sup> , no (%)          | 75 (22.7%)                       | 255 (77.3%)     |         |
| Group I, < 500 /mm <sup>3</sup> , no (%)                     | 44 (40.0%)                       | 66 (60.0%)      |         |
| Platelet, missing n=2 / n=83, no (%)                         |                                  |                 | 0.003   |
| ≥ 100,000 /mm <sup>3</sup> , no (%)                          | 141 (19.7%)                      | 573 (80.3%)     |         |
| < 100,000 /mm <sup>3</sup> , no (%)                          | 21 (37.5%)                       | 35 (62.5%)      |         |

**Table S2.** Comparisons of studies having data regarding mortality and proportion of lymphopenia defined as absolute lymphocyte count < 1,000 /mm<sup>3</sup>.

| Study               | Number | Proportion of lymphopenia of total cohort (%) | Mortality | Remark                  |
|---------------------|--------|-----------------------------------------------|-----------|-------------------------|
| Yang X et al.       | 52     | 84.6%                                         | 61.5%     | China data (Wuhan)      |
| Richardson S et al. | 5,645  | 60.0%                                         | 21.0%     | America data (New York) |

---

|                  |     |       |       |                                    |
|------------------|-----|-------|-------|------------------------------------|
| Current study    | 770 | 57.1% | 21.0% | Korean data<br>(Nationwide cohort) |
| Acharya D et al. | 324 | 19.1% | 7.4%  | Korean data<br>(Gyeongsangbuk-do)  |
| Moon S-S et al.  | 352 | 17.9% | 6.8%  | Korean data<br>(Gyeongsangbuk-do)  |

---
